# Supplementary material for: Water, sanitation, and women’s empowerment: A systematic review and qualitative metasynthesis
Source: PLOS journal article supplement (doi:10.1371/journal.pwat.0000026), 2022-06-07
Supplement: S8 (10.1371/journal.pwat.0000026.s008) [file journal.pwat.0000026.s008]

**S2 Fig: Number of Articles Addressing Each Domain and Sub-Domain of Empowerment, by Water, Sanitation, or Water & Sanitation Focus**
